# Supplementary material
Source: PubMed Central journal article supplement (PMC3646403)
Supplement: pr301017e_si_001.pdf [file pr301017e_si_001.pdf]

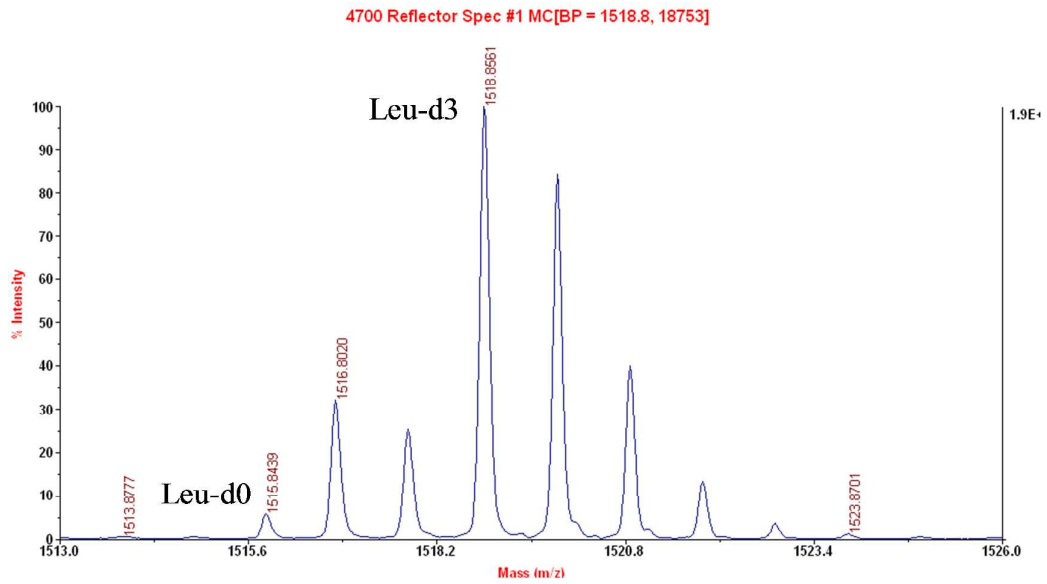

**Supplemental Figure 1. The labeling efficiency of Leu-d3 in  $\beta$ -actin.** Leu-d3 almost completely incorporates into protein after 7 growth passages. The m/z 1518 and 1515 represent the Leu-d3 labeling and Leu-d0 non-labeling peptide respectively in  $\beta$ -actin.

A

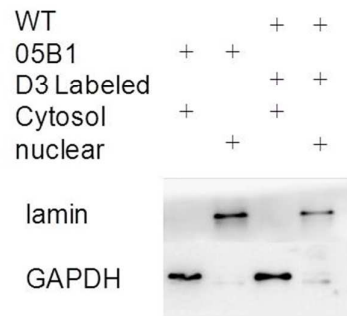

B

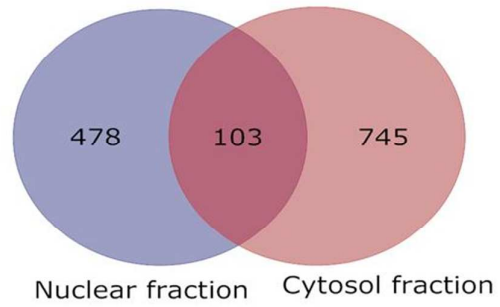

**Supplemental Figure 2. Separation of cytoplasmic and nuclear proteins.** (A) The results of separation as validated by Western blot analysis. (B) Venn diagram representing the differently expressed proteins in their corresponding subcellular compartments.



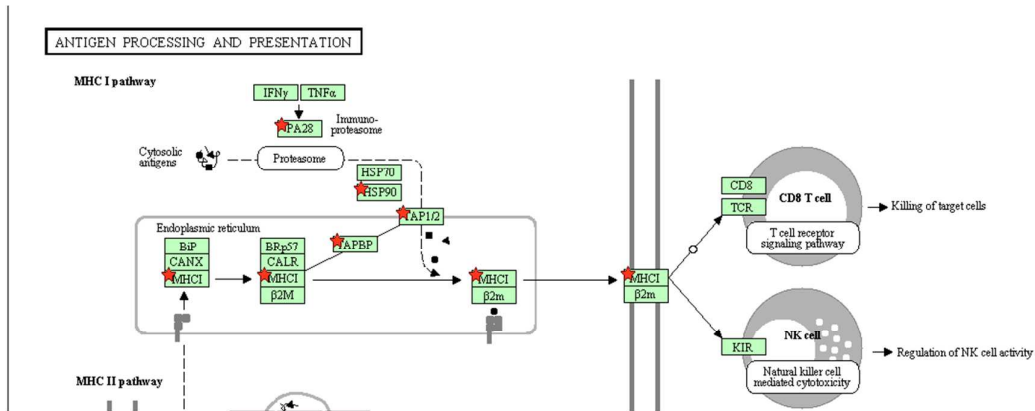

**Supplemental Figure 4. Differentially expressed proteins identified in PPE38-stimulated macrophages that are involved in antigen processing and presentation.** The differentially expressed proteins identified in PPE38-stimulated macrophages were submitted to DAVID (<http://david.abcc.ncifcrf.gov/>) to obtain the KEGG pathway regarding antigen processing and presentation. The red stars denote downregulated proteins.

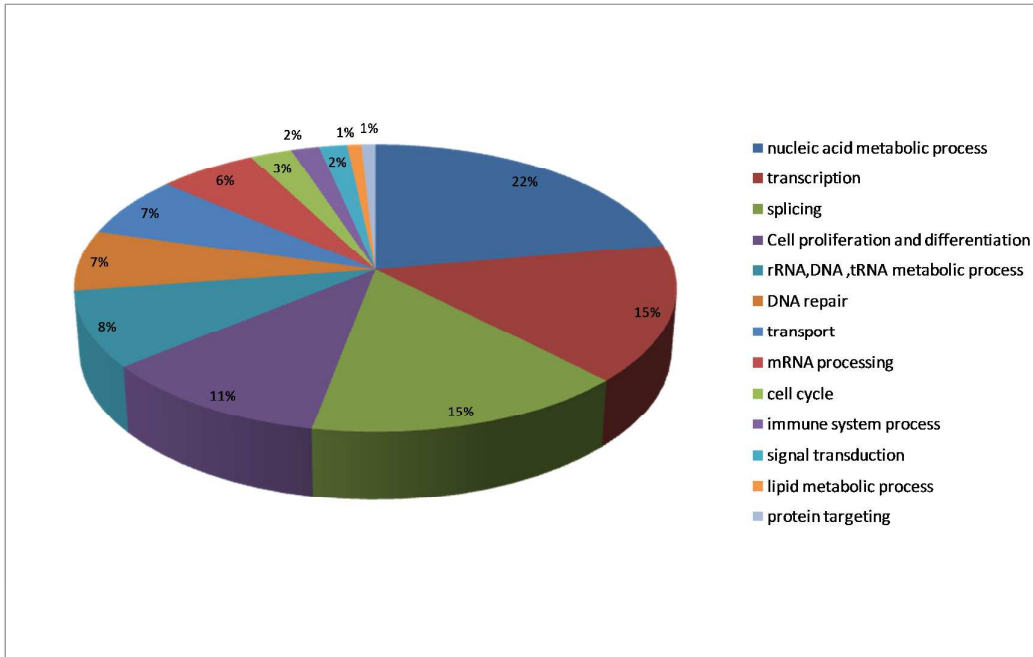

**Supplemental Figure 5. Functional analysis of TF-associated proteins.** The

TF-associated proteins were submitted to PANTHER (<http://www.pantherdb.org/>) to

identify their associated functional process and corresponding percentages.

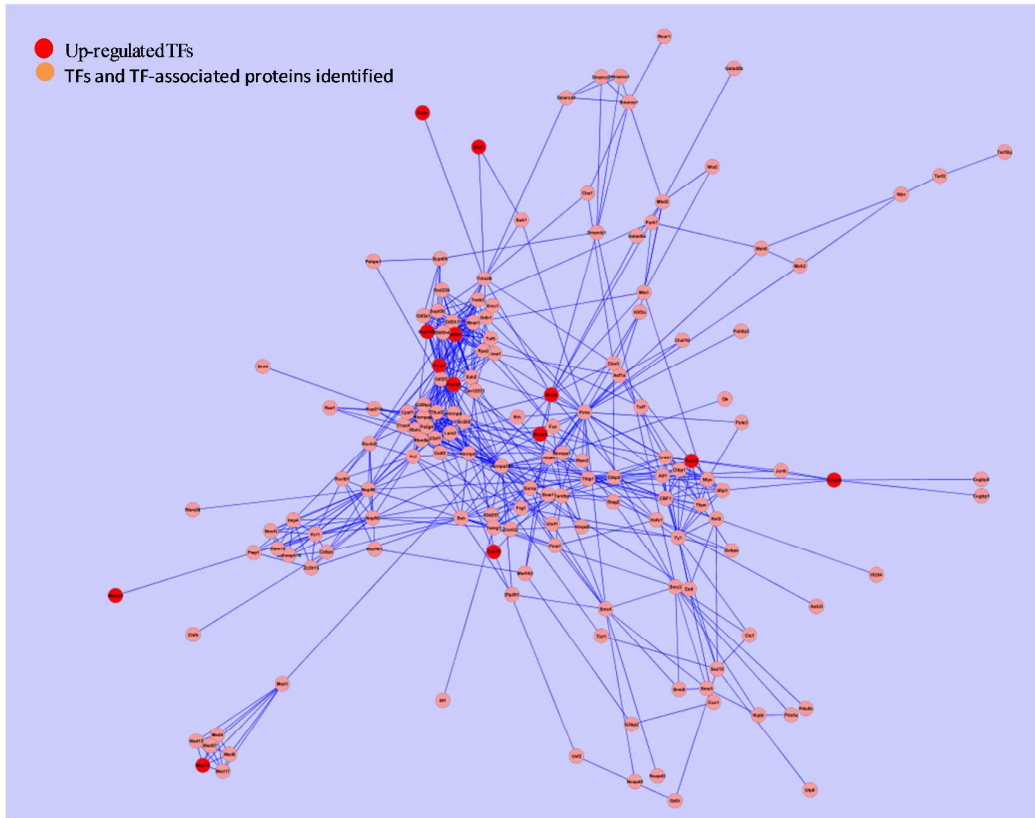

**Supplemental Figure 6. The network of TFs and TF-associated proteins.**

TF-associated proteins in the nuclear fraction identified in our study and their connections to the identified TFs were mapped using STRING (<http://string.embl.de/>).
